# Supplementary material for: Ultrahigh activity and broad temperature resistance of amine–imine cobalt precatalysts for butadiene polymerization
Source: Royal Society of Chemistry journal article supplement (doi:10.1039/d3dt02460a), 2023-01-01
Supplement: d3dt02460a1.pdf [file d3dt02460a1.pdf]

## Supporting Information

# Ultra-High Activity and Broad-Spectrum Temperature Resistance of Amine-Imine Cobalt Pre- Catalysts in Butadiene Polymerization

Yuan Fu,<sup>1</sup> Jian Tan,<sup>1</sup> Jing Hua<sup>1\*</sup>

<sup>1</sup>Key Laboratory of Rubber-Plastics, Ministry of Education / Shandong Provincial Key Laboratory of Rubber-plastics, Qingdao University of Science and Technology, Qingdao 266042, P.R. China.

Table S1. Thermostability of the Co3 systems at 80°C and 100°C<sup>a</sup>

| run | Al  | T(°C) | t(min) | yield | Activity <sup>b</sup> | M <sub>n</sub> <sup>c</sup> /10 <sup>4</sup> | PDI  | microstructure <sup>d</sup> |           |      |
|-----|-----|-------|--------|-------|-----------------------|----------------------------------------------|------|-----------------------------|-----------|------|
|     |     |       |        |       |                       |                                              |      | cis-1,4                     | trans-1,4 | 1,2  |
| 1   | 100 | 80    | 10     | 83.3% | 6759                  | 14.9                                         | 4.71 | 92.2%                       | 4.6%      | 3.2% |
| 2   | 100 | 80    | 60     | 87.5% | 1183                  | 33.5                                         | 4.45 | 90.3%                       | 4.7%      | 5.0% |
| 3   | 100 | 80    | 120    | 92.2% | 623                   | 35.2                                         | 3.68 | 90.5%                       | 5.4%      | 4.1% |
| 4   | 100 | 100   | 10     | 72.9% | 5915                  | 14.2                                         | 4.33 | 87.4%                       | 8.5%      | 4.1% |
| 5   | 100 | 100   | 60     | 84.4% | 1041                  | 15.9                                         | 4.77 | 88.9%                       | 7.9%      | 3.2% |
| 6   | 100 | 100   | 120    | 85.8% | 580                   | 24.1                                         | 3.99 | 88.3%                       | 7.3%      | 4.4% |

<sup>a</sup> Polymerization conditions: in toluene, [Bd] = 0.13 g/mL, [Bd]/[Co] = 25000, EASC as a co-catalyst. <sup>b</sup> Activity in units of kg<sub>polymer</sub>·mol<sup>-1</sup>

<sup>c</sup> M<sub>n</sub> and PDI were determined by GPC. <sup>d</sup> Determined by IR and <sup>1</sup>H-NMR.

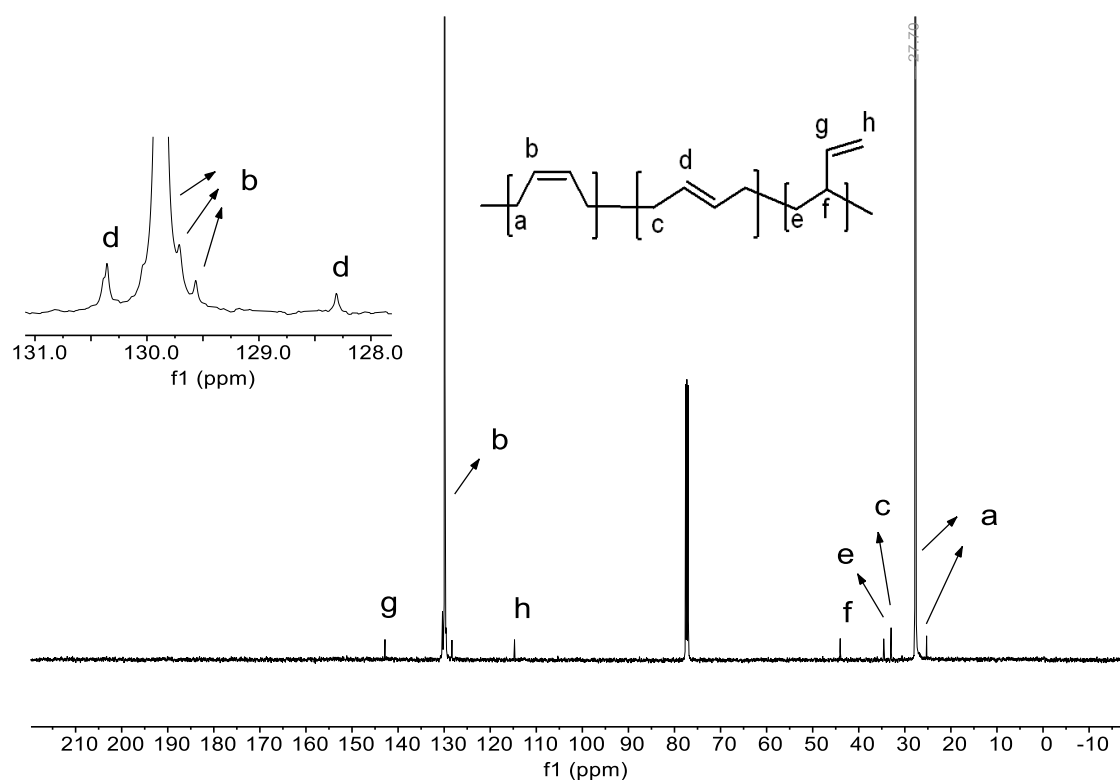

Figure S1. Representative <sup>13</sup>C NMR spectrum and its assignment<sup>1-3</sup> (Co3, Table 4)

1. M. A. Krajewski-Bertrand and F. Lauprêtre, *Macromolecules*, 1996, 29, 7616-7618.
2. G. Van der Velden, C. Didden, T. Veermans and J. Beulen, *Macromolecules*, 1987, 20, 1252-1256.
3. A. D. H. Clague, J. A. M. van Broekhoven and L. P. Blaauw, *Rubber Chemistry and Technology*, 1974, 47, 1136-1150.

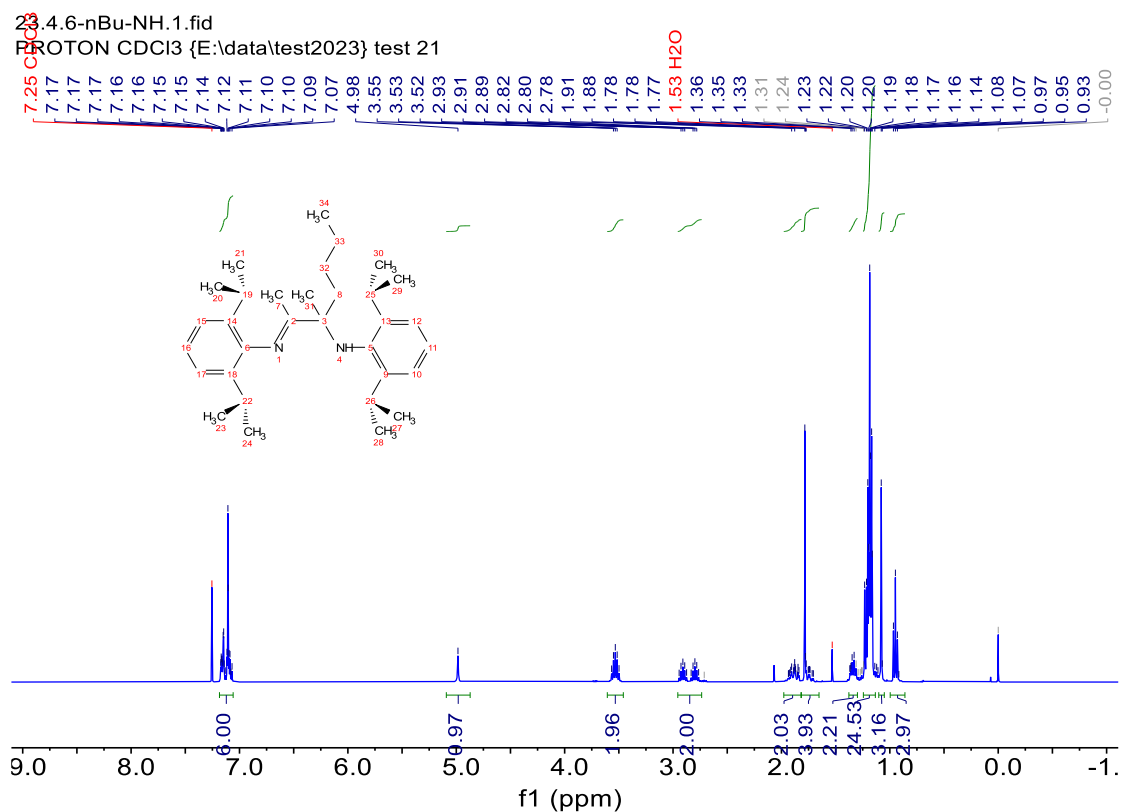

Figure S2. <sup>1</sup>H NMR spectrum of L1

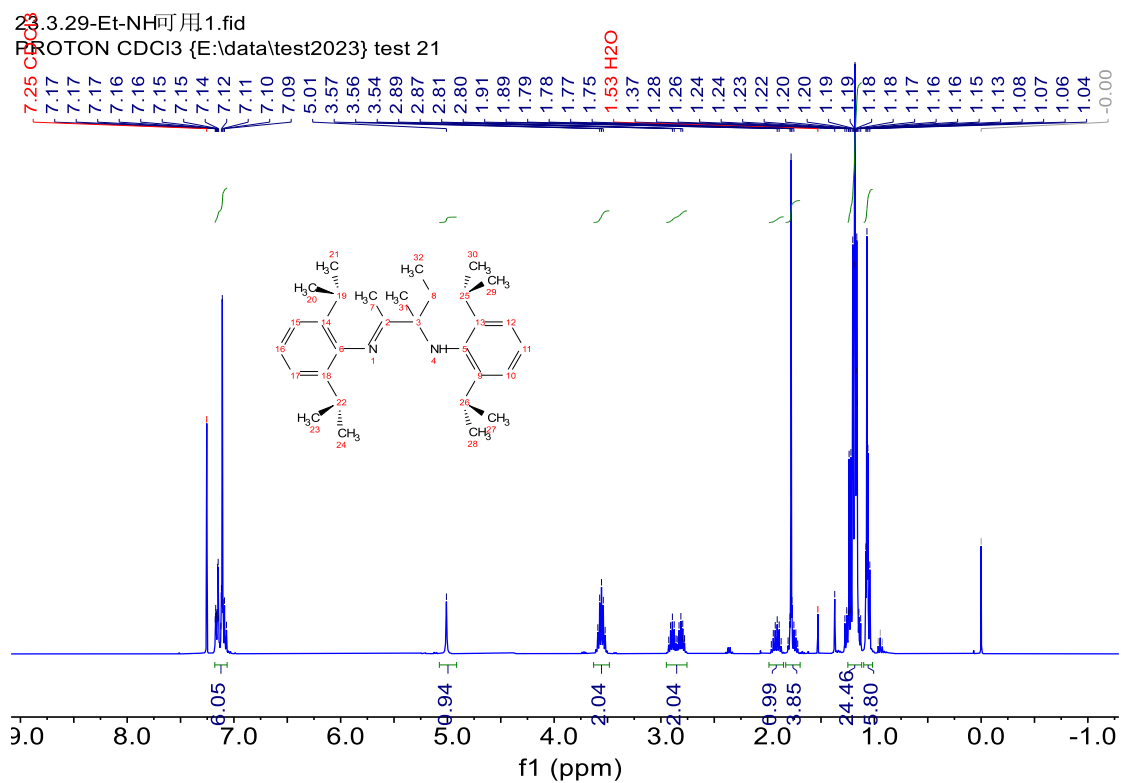

Figure S3. <sup>1</sup>H NMR spectrum of L2

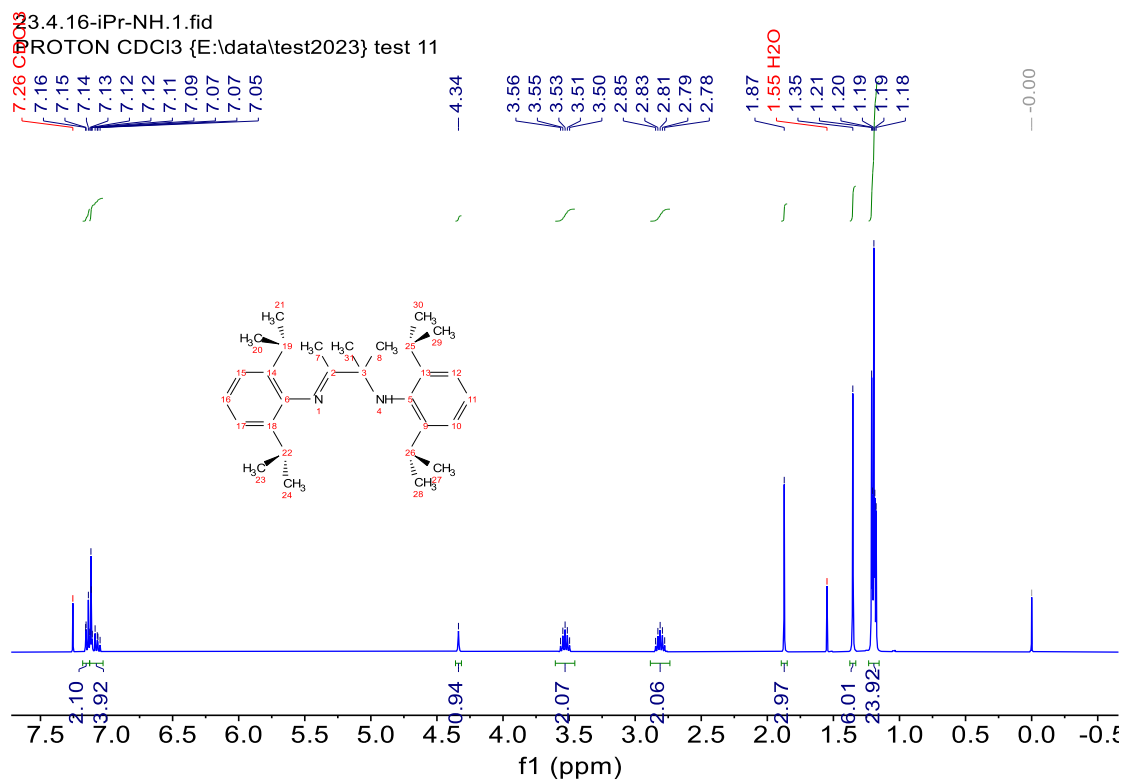

Figure S4.  $^1\text{H}$  NMR spectrum of L3

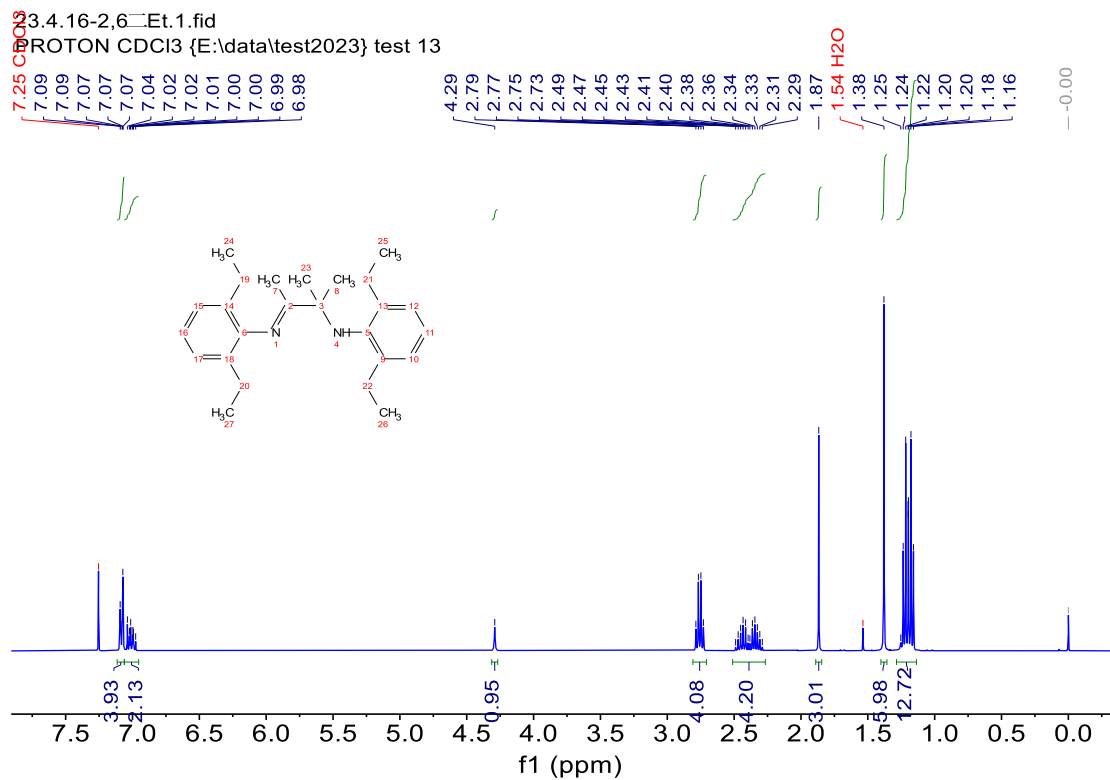

Figure S5.  $^1\text{H}$  NMR spectrum of L4

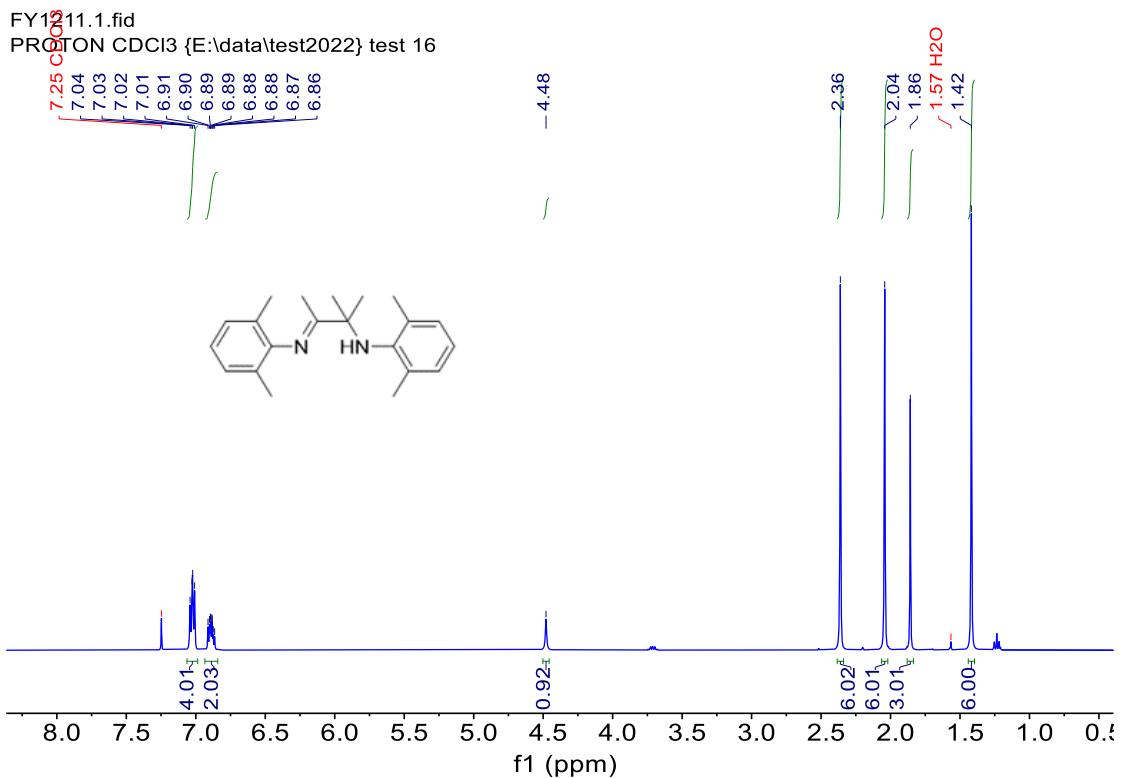

Figure S6. <sup>1</sup>H NMR spectrum of L1

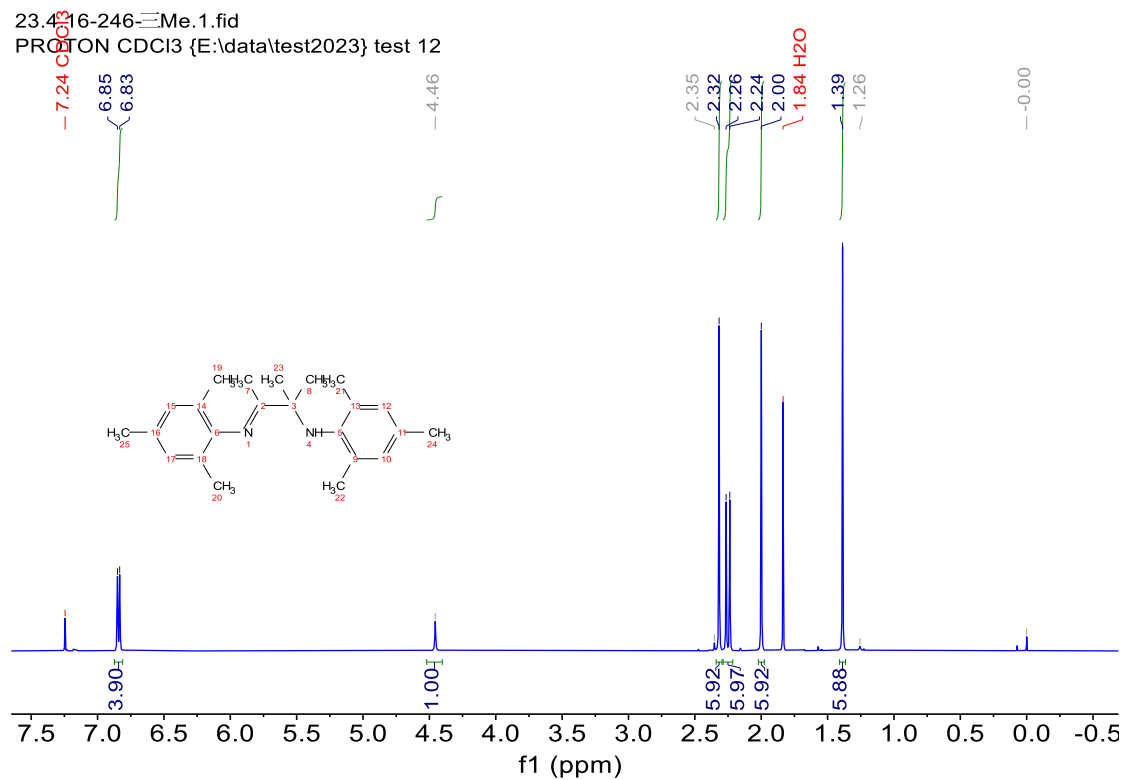

Figure S7. <sup>1</sup>H NMR spectrum of L6

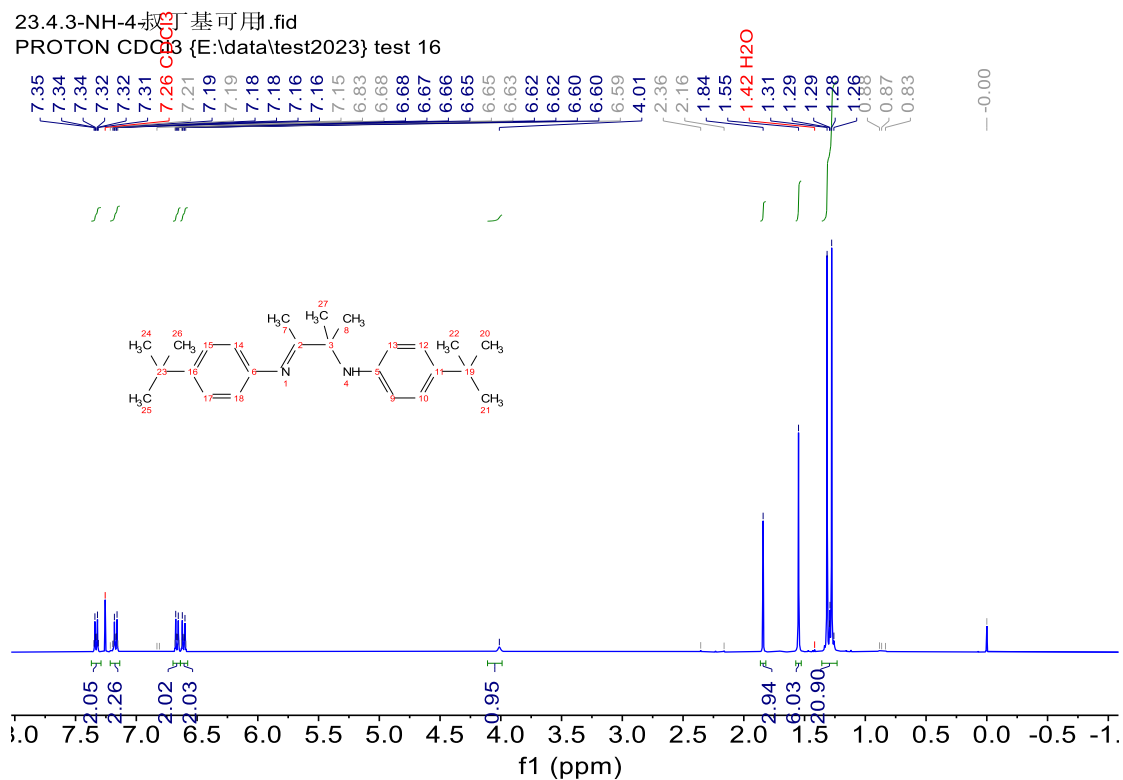

Figure S8.  $^1\text{H}$  NMR spectrum of L7

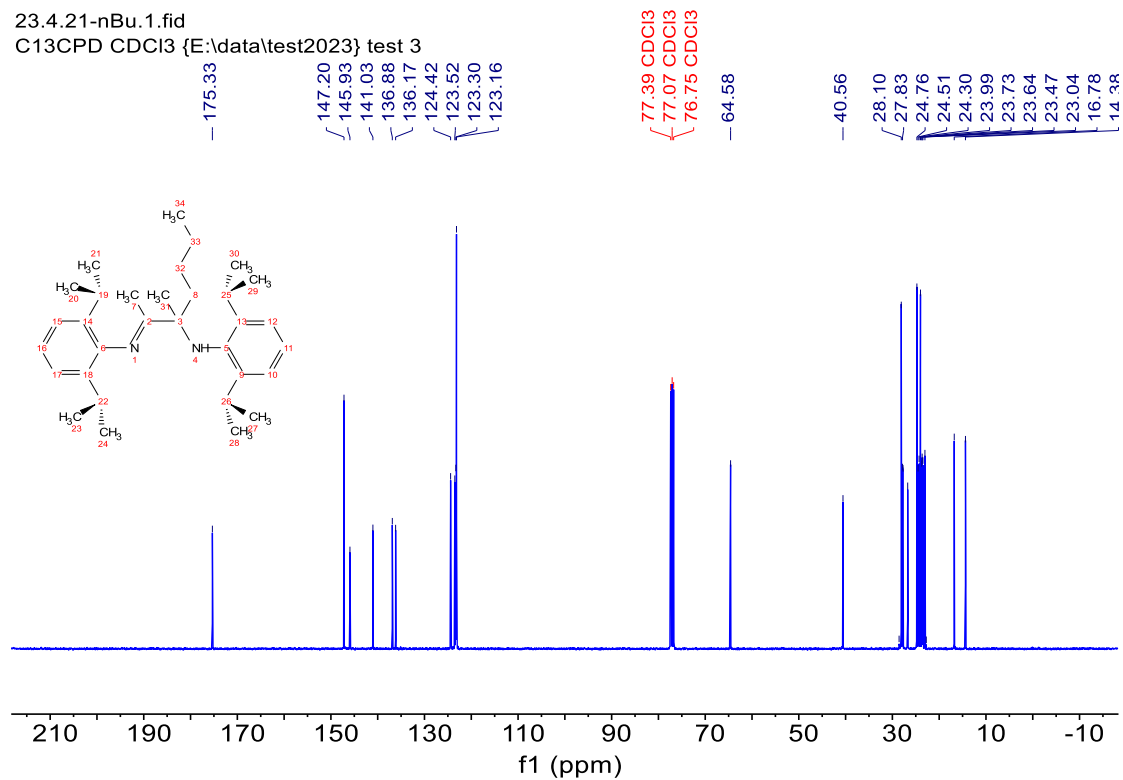

Figure S9.  $^{13}\text{C}$  NMR spectrum of L1

23.4.21-Et.1.fid  
C13CPD CDCl3 {E:\data\test2023} test 4

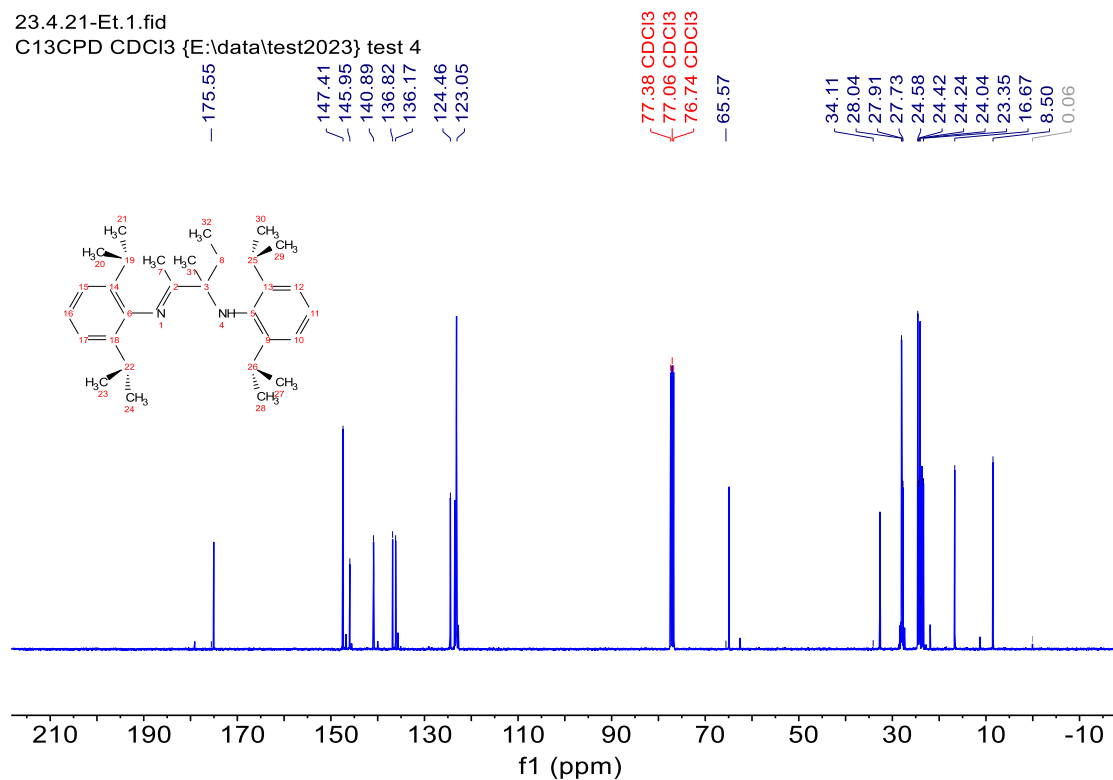

Figure S10. <sup>13</sup>C NMR spectrum of L2

23.4.16-iPr.1.fid  
C13CPD CDCl3 {E:\data\test2023} test 17

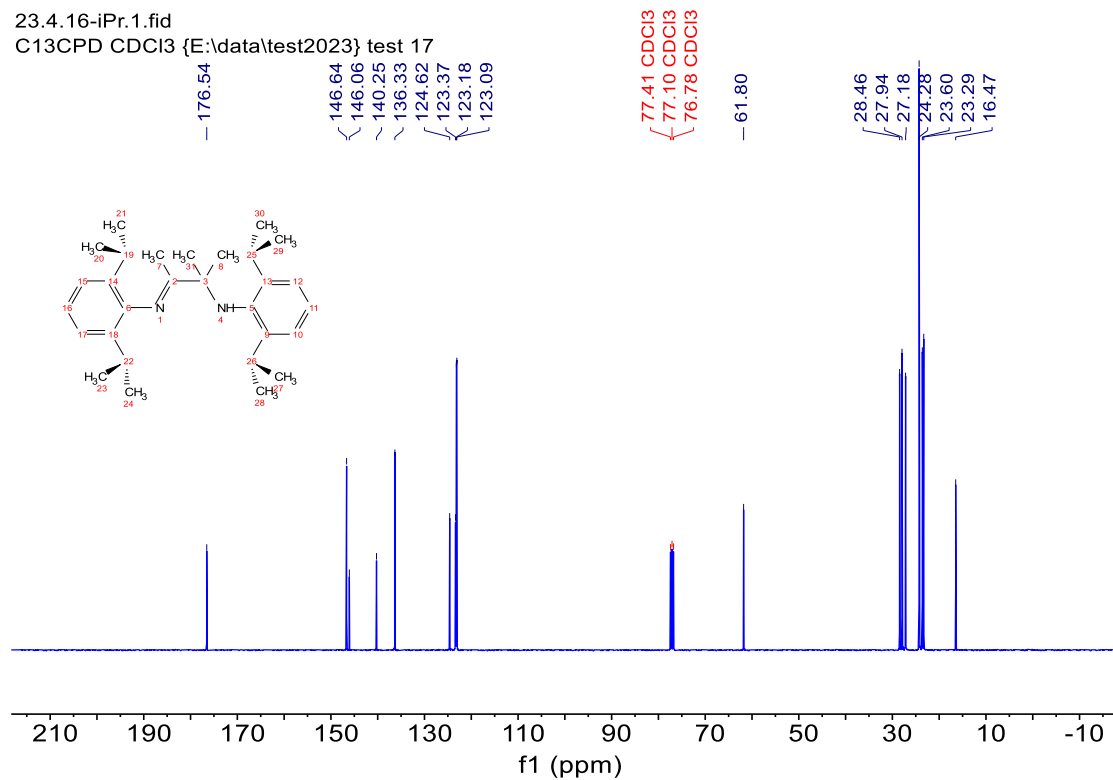

Figure S11. <sup>13</sup>C NMR spectrum of L3

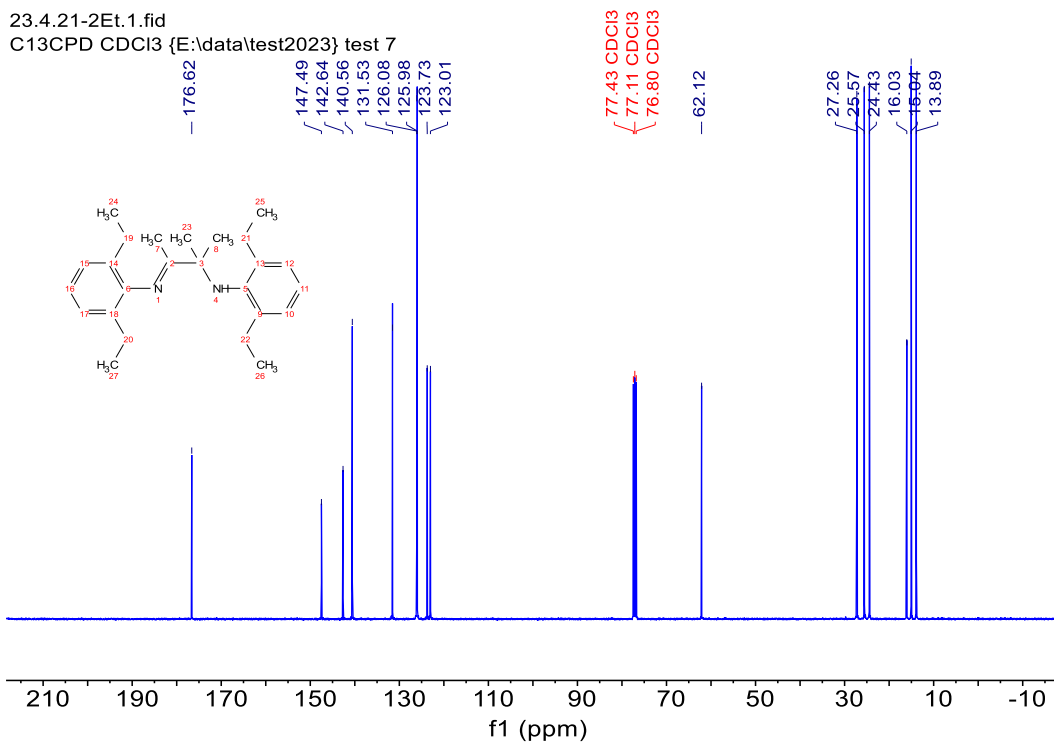

Figure S12.  $^{13}\text{C}$  NMR spectrum of L4

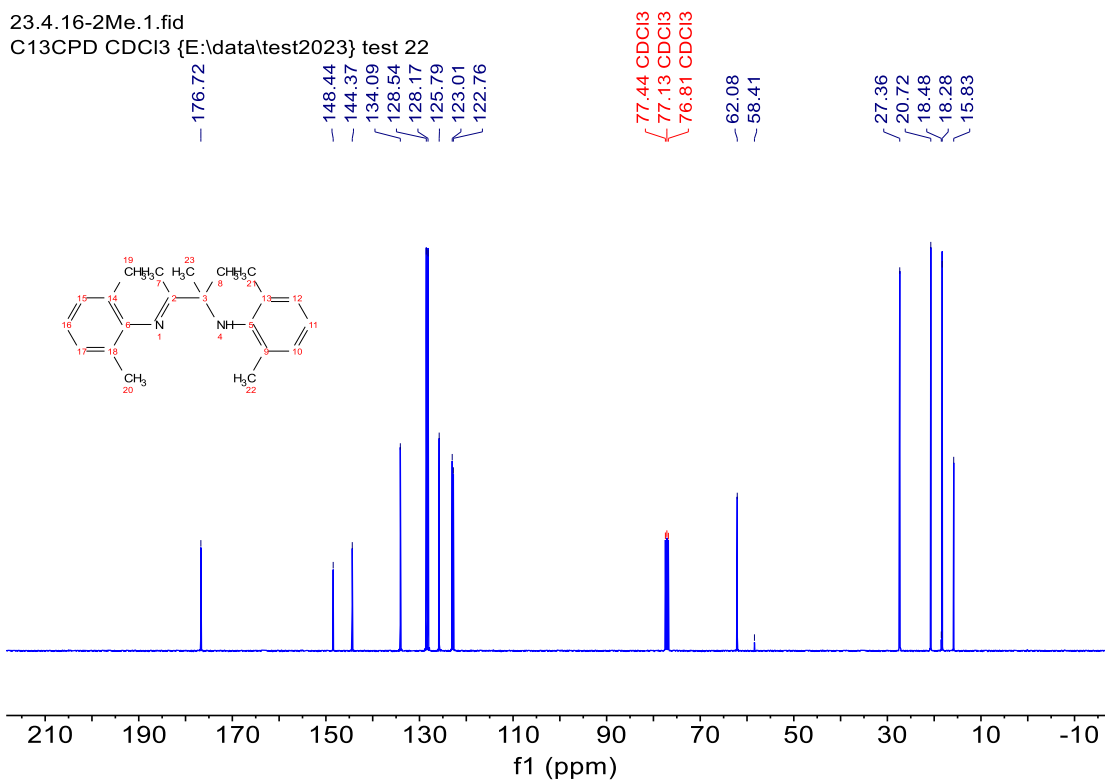

Figure S13.  $^{13}\text{C}$  NMR spectrum of L5



23.4.21-3Me.1.fid  
 C13CPD CDCl3 {E:\data\test2023} test 5

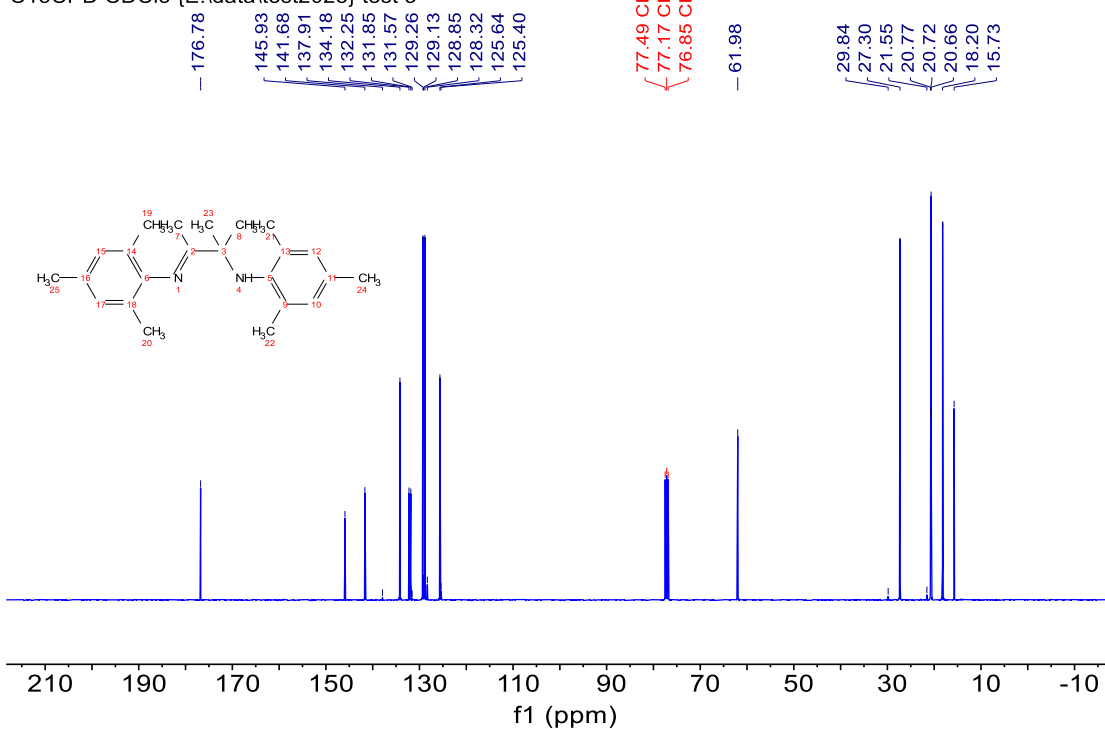

Figure S14. <sup>13</sup>C NMR spectrum of L6

23.4.16-4Bu.1.fid  
 C13CPD CDCl3 {E:\data\test2023} test 21

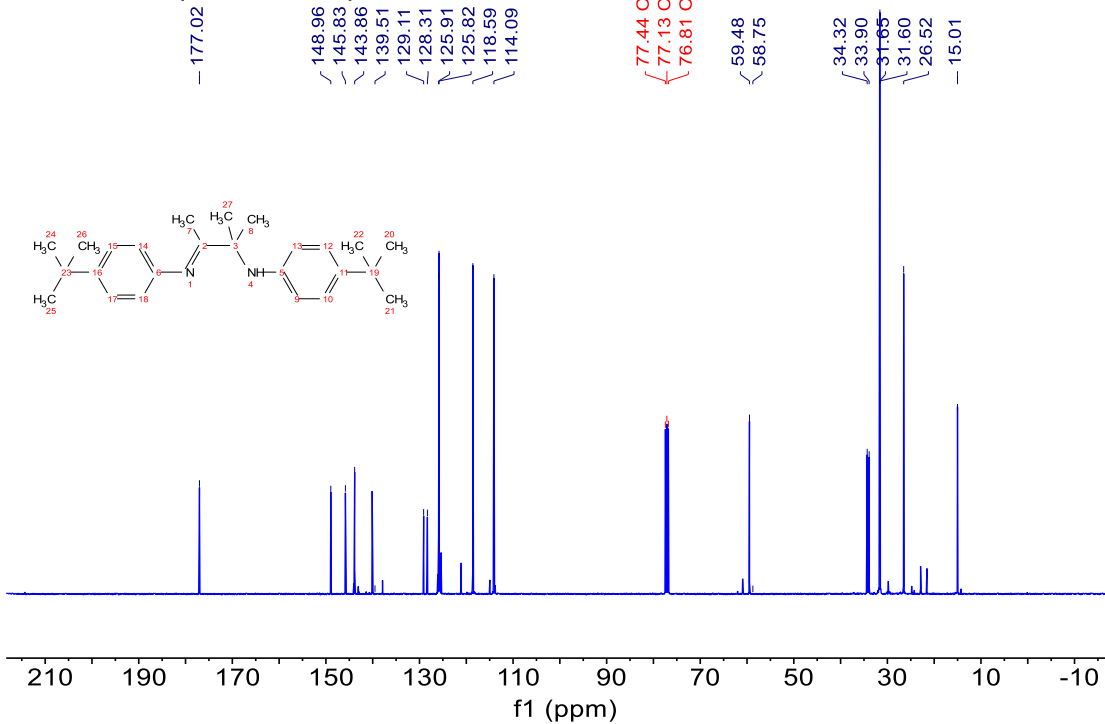

Figure S15. <sup>13</sup>C NMR spectrum of L7

## The hydrogen atom treatment, restraints and constraints used in the refinement

**Refinement of 2262742:** The data were truncated by 0.84 angstrom due to the  $I/\sigma$  drops below 2 at about  $2\theta = 50$  (*ca.* 0.84 Å). No significant disorder found in this structure. The hydrogen atom (H2) on the nitrogen atom (N2) of amine group was located by difference Fourier syntheses and was refined freely. All of the other hydrogen atoms were placed at the calculated positions and were refined as riding model. The isotropic  $U$  value of hydrogen atoms ( $U_{\text{iso}}$ ) were refined as:  $U_{\text{iso}}(\text{N-H}) = 1.2 U_{\text{eq}}(\text{N})$ ,  $U_{\text{iso}}(\text{C}_{\text{sp}^2}\text{-H}) = 1.2 U_{\text{eq}}(\text{C}_{\text{sp}^2})$ ,  $U_{\text{iso}}(\text{C}_{\text{sp}^3}\text{-H}) = 1.2 U_{\text{eq}}(\text{C})$ , and  $U_{\text{iso}}(\text{CH}_3) = 1.2 U_{\text{eq}}(\text{C})$ . The residual electron densities were of no chemical significance.

**Refinement of 2262744:** The data were truncated by 0.93 angstrom due to the  $I/\sigma$  drops below 2 at about  $2\theta = 45$  (*ca.* 0.93 Å). The linker fragment  $[\text{C}(\text{CH}_3)\text{C}(\text{CH}_3)_2]$ , labeled as C13, C14, C15, C16, and C17) between two nitrogen atoms of the imine ligand were refined as two-components-disorder (C13~C17 and C13A~C17A) over two sites with occupancies 0.892:0.108, as well as the hydrogen atoms on the nitrogen atom of amine group. The methyl groups in one isopropyl of the two diisopropylphenyl (dipp) group were refined as two-components-disorder (C8~C9/C8A~C9A and C28~C29/C28A~C29A) over two sites with occupancies 0.542:0.458 and 0.412:0.588, respectively. The methylene and one chloride atom of the free solvent dichloromethane were refined as two-components-disorder (C30, Cl3 and C30A, Cl3A) over two sites with occupancies 0.646:0.354. The hydrogen atoms on the nitrogen atom of amine group cannot be located by difference Fourier syntheses due to disorder, and thus were placed at the calculated positions and were refined as riding model. The isotropic  $U$  value of hydrogen atoms ( $U_{\text{iso}}$ ) were refined as:  $U_{\text{iso}}(\text{N-H}) = 1.2 U_{\text{eq}}(\text{N})$ ,  $U_{\text{iso}}(\text{C}_{\text{sp}^2}\text{-H}) = 1.2 U_{\text{eq}}(\text{C}_{\text{sp}^2})$ ,  $U_{\text{iso}}(\text{C}_{\text{sp}^3}\text{-H}) = 1.2 U_{\text{eq}}(\text{C})$ , and  $U_{\text{iso}}(\text{CH}_3) = 1.2 U_{\text{eq}}(\text{C})$ . Necessary restraints/constraints (SADI, DFIX, FLAT, RIGU and SIMU) were applied to prevent deformation of the disordered fragments and maintain its anisotropic displacement parameters within a reasonable range. The residual electron densities were of no chemical significance.

**Refinement of 2262745:** The whole structure was on mirror plane leading to a special disorder of the entire ligand across symmetry element with occupancies of 0.5. The hydrogen atoms on the nitrogen atom of amine group cannot be located by difference Fourier syntheses due to disorder, and thus were placed at the calculated positions and were refined as riding model. The isotropic  $U$  value of hydrogen atoms ( $U_{\text{iso}}$ ) were refined as:  $U_{\text{iso}}(\text{N-H}) = 1.2 U_{\text{eq}}(\text{N})$ ,  $U_{\text{iso}}(\text{C}_{\text{sp}^2}\text{-H}) = 1.2 U_{\text{eq}}(\text{C}_{\text{sp}^2})$ ,  $U_{\text{iso}}(\text{C}_{\text{sp}^3}\text{-H}) = 1.2 U_{\text{eq}}(\text{C})$ , and  $U_{\text{iso}}(\text{CH}_3) = 1.2 U_{\text{eq}}(\text{C})$ . Necessary restraints/constraints (DFIX, RIGU and SIMU) were applied to prevent deformation of the disordered fragments and maintain its anisotropic displacement parameters within a reasonable range. The residual electron densities were of no chemical significance.

**Table S2. Crystal data and structure refinement for Co3 (CDCC 2262744).**

|                                             |                                                                  |
|---------------------------------------------|------------------------------------------------------------------|
| Identification code                         | 2262744                                                          |
| Empirical formula                           | C <sub>30</sub> H <sub>46</sub> Cl <sub>4</sub> CoN <sub>2</sub> |
| Formula weight                              | 635.42                                                           |
| Temperature/K                               | 300.00                                                           |
| Crystal system                              | monoclinic                                                       |
| Space group                                 | P2 <sub>1</sub> /c                                               |
| a/Å                                         | 8.271(4)                                                         |
| b/Å                                         | 19.167(9)                                                        |
| c/Å                                         | 21.451(10)                                                       |
| α/°                                         | 90                                                               |
| β/°                                         | 93.145(8)                                                        |
| γ/°                                         | 90                                                               |
| Volume/Å <sup>3</sup>                       | 3396(3)                                                          |
| Z                                           | 4                                                                |
| ρ <sub>calc</sub> /cm <sup>3</sup>          | 1.243                                                            |
| μ/mm <sup>-1</sup>                          | 0.840                                                            |
| F(000)                                      | 1340.0                                                           |
| Crystal size/mm <sup>3</sup>                | 0.26 × 0.23 × 0.21                                               |
| Radiation                                   | MoKα (λ = 0.71073)                                               |
| 2θ range for data collection/°              | 2.852 to 45.814                                                  |
| Index ranges                                | -8 ≤ h ≤ 8, -20 ≤ k ≤ 20, -23 ≤ l ≤ 22                           |
| Reflections collected                       | 18116                                                            |
| Independent reflections                     | 4548 [R <sub>int</sub> = 0.0683, R <sub>sigma</sub> = 0.0605]    |
| Data/restraints/parameters                  | 4548/393/453                                                     |
| Goodness-of-fit on F <sup>2</sup>           | 1.037                                                            |
| Final R indexes [I ≥ 2σ (I)]                | R <sub>1</sub> = 0.0602, wR <sub>2</sub> = 0.1475                |
| Final R indexes [all data]                  | R <sub>1</sub> = 0.0863, wR <sub>2</sub> = 0.1644                |
| Largest diff. peak/hole / e Å <sup>-3</sup> | 0.49/-0.36                                                       |

**Table S3. Crystal data and structure refinement for Co4 (CDCC 2262745)**

|                                             |                                                                  |
|---------------------------------------------|------------------------------------------------------------------|
| Identification code                         | 2262745                                                          |
| Empirical formula                           | C <sub>25</sub> H <sub>36</sub> Cl <sub>2</sub> CoN <sub>2</sub> |
| Formula weight                              | 494.39                                                           |
| Temperature/K                               | 300.00                                                           |
| Crystal system                              | orthorhombic                                                     |
| Space group                                 | Pnma                                                             |
| a/Å                                         | 14.7263(8)                                                       |
| b/Å                                         | 17.7923(12)                                                      |
| c/Å                                         | 9.6321(6)                                                        |
| α/°                                         | 90                                                               |
| β/°                                         | 90                                                               |
| γ/°                                         | 90                                                               |
| Volume/Å <sup>3</sup>                       | 2523.8(3)                                                        |
| Z                                           | 4                                                                |
| ρ <sub>calc</sub> /cm <sup>3</sup>          | 1.301                                                            |
| μ/mm <sup>-1</sup>                          | 0.906                                                            |
| F(000)                                      | 1044.0                                                           |
| Crystal size/mm <sup>3</sup>                | 0.29 × 0.26 × 0.25                                               |
| Radiation                                   | MoKα (λ = 0.71073)                                               |
| 2θ range for data collection/°              | 6.822 to 59.99                                                   |
| Index ranges                                | -20 ≤ h ≤ 18, -24 ≤ k ≤ 25, -13 ≤ l ≤ 13                         |
| Reflections collected                       | 72137                                                            |
| Independent reflections                     | 3769 [R <sub>int</sub> = 0.0852, R <sub>sigma</sub> = 0.0342]    |
| Data/restraints/parameters                  | 3769/325/269                                                     |
| Goodness-of-fit on F <sup>2</sup>           | 1.097                                                            |
| Final R indexes [I ≥ 2σ (I)]                | R <sub>1</sub> = 0.1037, wR <sub>2</sub> = 0.2471                |
| Final R indexes [all data]                  | R <sub>1</sub> = 0.1283, wR <sub>2</sub> = 0.2585                |
| Largest diff. peak/hole / e Å <sup>-3</sup> | 0.74/-0.58                                                       |

**Table S4. Crystal data and structure refinement for Co6 (CDCC 2262742).**

|                                             |                                                                  |
|---------------------------------------------|------------------------------------------------------------------|
| Identification code                         | 2262742                                                          |
| Empirical formula                           | C <sub>23</sub> H <sub>32</sub> Cl <sub>2</sub> CoN <sub>2</sub> |
| Formula weight                              | 466.33                                                           |
| Temperature/K                               | 300                                                              |
| Crystal system                              | monoclinic                                                       |
| Space group                                 | P2 <sub>1</sub> /n                                               |
| a/Å                                         | 11.3734(16)                                                      |
| b/Å                                         | 14.684(2)                                                        |
| c/Å                                         | 15.247(2)                                                        |
| α/°                                         | 90                                                               |
| β/°                                         | 108.415(2)                                                       |
| γ/°                                         | 90                                                               |
| Volume/Å <sup>3</sup>                       | 2416.0(6)                                                        |
| Z                                           | 4                                                                |
| ρ <sub>calc</sub> /g/cm <sup>3</sup>        | 1.282                                                            |
| μ/mm <sup>-1</sup>                          | 0.942                                                            |
| F(000)                                      | 980.0                                                            |
| Crystal size/mm <sup>3</sup>                | 0.26 × 0.23 × 0.11                                               |
| Radiation                                   | MoKα (λ = 0.71073)                                               |
| 2θ range for data collection/°              | 3.932 to 50.082                                                  |
| Index ranges                                | -13 ≤ h ≤ 12, -17 ≤ k ≤ 17, -18 ≤ l ≤ 18                         |
| Reflections collected                       | 16686                                                            |
| Independent reflections                     | 4268 [R <sub>int</sub> = 0.0585, R <sub>sigma</sub> = 0.0559]    |
| Data/restraints/parameters                  | 4268/0/266                                                       |
| Goodness-of-fit on F <sup>2</sup>           | 1.095                                                            |
| Final R indexes [I ≥ 2σ (I)]                | R <sub>1</sub> = 0.0632, wR <sub>2</sub> = 0.1185                |
| Final R indexes [all data]                  | R <sub>1</sub> = 0.0976, wR <sub>2</sub> = 0.1317                |
| Largest diff. peak/hole / e Å <sup>-3</sup> | 0.69/-0.53                                                       |
